# Supplementary material
Source: ML conference proceedings conference paper supplement (https://openreview.net/forum?id=1HjzhdTEC7)

# Model Elo vs. Fallacy Rate

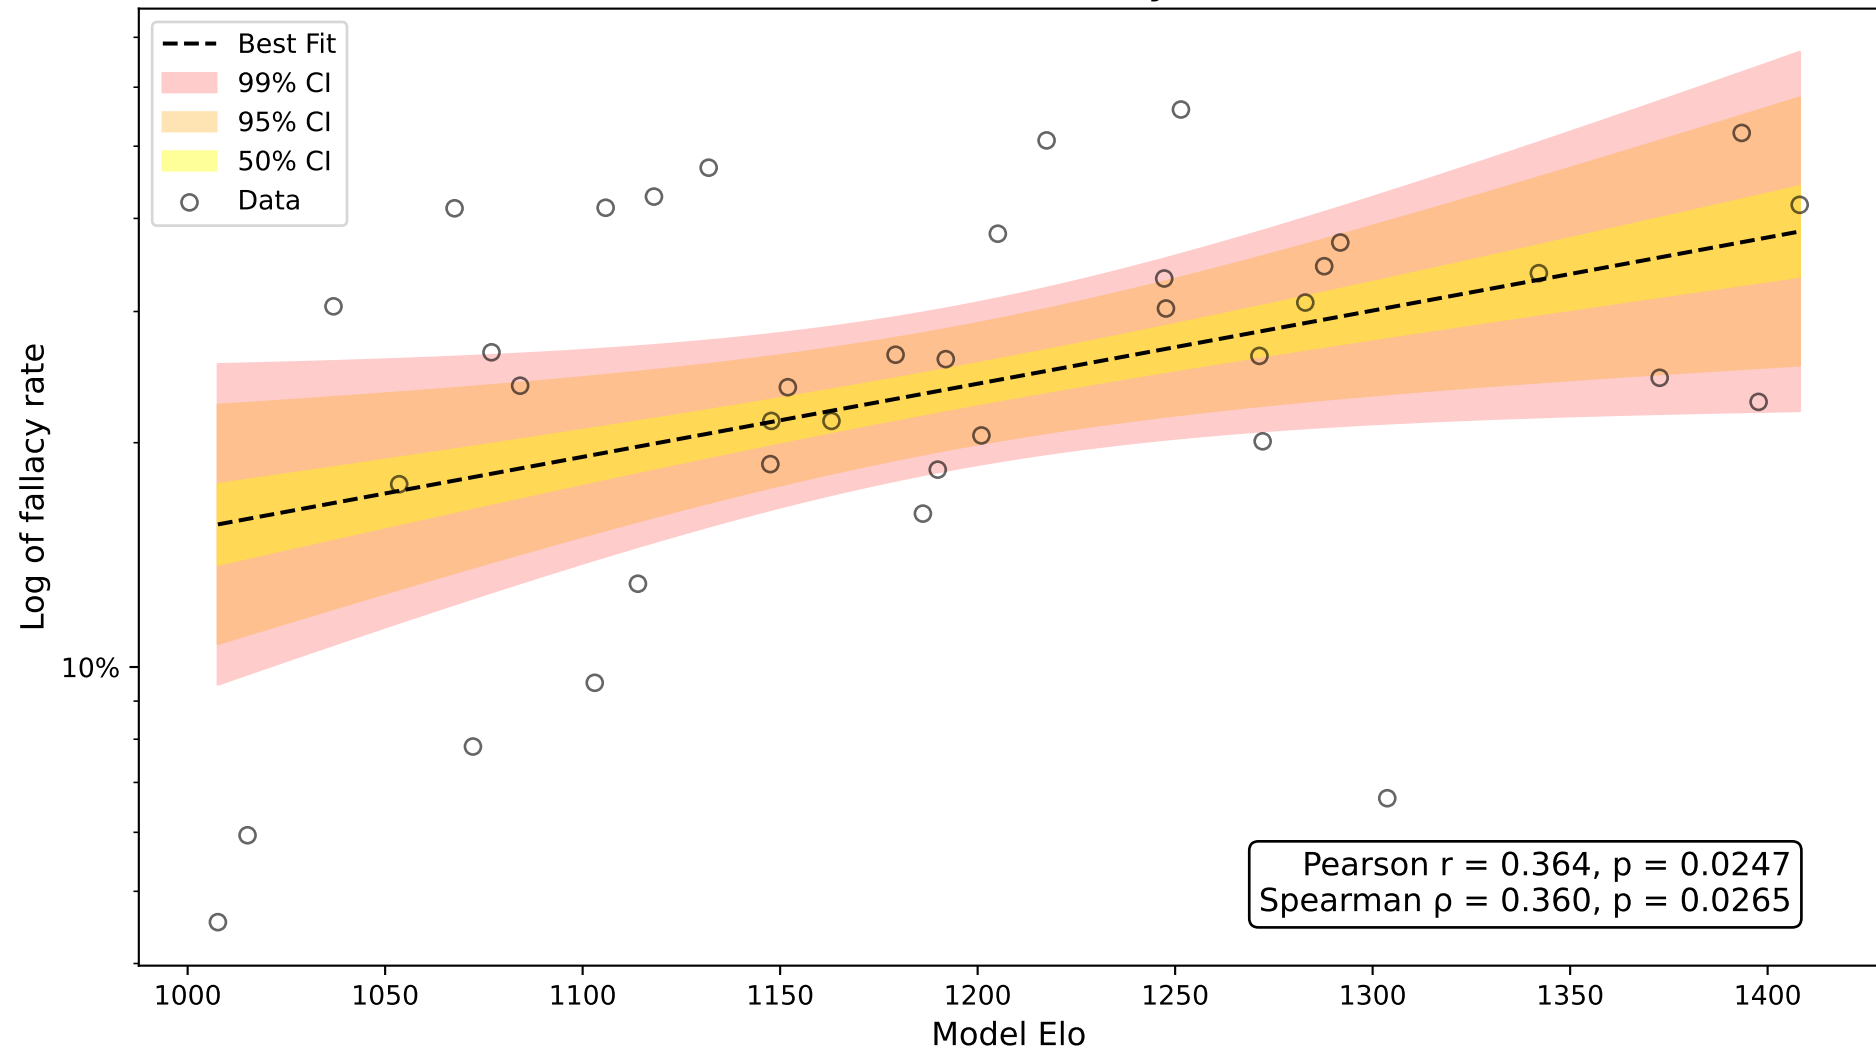

Supplement: supplementary_material [file Model_Elo_vs_Fallacy_Rate.pdf › ICLR-ETR-SuppMatts/Model_Elo_vs_Fallacy_Rate.pdf]
